# Supplementary material for: Developmental expression of DAX1 in the European sea bass, Dicentrarchus labrax: lack of evidence for sexual dimorphism during sex differentiation
Source: PubMed Central journal article supplement (PMC1891300; doi:10.1186/1477-7827-5-19), 2007-05-30
Supplement: 1477-7827-5-19-S1.pdf [file 1477-7827-5-19-S1.pdf]

GGCACGAGGGCTATCAGGGGCTAAGAAAACAGCGCTACCTCTGTCACTGACCTCCGGCGCTTCAAAGAGAC 71

M A T L E G 6

AGCGGGACGCGCTGAGCTCCATCCCATGTAGAGCGGCCAGCGGCC ATG GCC ACG CTG GAG GGC 134

C R C R G A S G R N N N S I L Y N I 24  
TGC CGC TGT CGG GGT GCC AGC GGC CGA AAC AAT AAC AGC ATC CTC TAC AAC ATT 188

L K S D S L A T A E E Q Q Q Q Q Q Q 42  
TTG AAG AGT GAC AGC CTT GCG ACT GCC GAG GAG CAA CAA CAA CAA CAA CAA CAA 242

Q Q Q Q Q Q H P Q Q Q Q T L Q Q L F 60  
CAA CAA CAA CAA CAA CAA CAT CCC CAA CAA CAA CAA ACC CTG CAA CAA TTG TTT 296

H K T S S T A A P A S L Q E L R Q Q 78  
CAC AAG ACC TCC TCC ACC GCC GCC CCA GCC TCT CTG CAG GAG CTC CGG CAG CAG 350

T C S C G S T R R R G I L R F P Q V 96  
ACT TGC TCC TGC GGC TCG ACC CGG CGC AGA GGT ATC CTC CGC TTC CCA CAG GTG 404

T C K A A S A V L V K T L R F V K N 114  
ACG TGC AAA GCC GCC TCG GCG GTT CTG GTG AAG ACG CTG CGG TTC GTG AAA AAC 458

V P C F R E L P E D D Q L M L I R S 132  
GTC CCC TGT TTT CGC GAG CTG CCG GAG GAC GAC CAG CTG ATG TTG ATC CGG AGC 512

G W A P L L V L G L A Q D R V D F E 150  
GGC TGG GCA CCC TTG CTC GTG CTG GGA CTC GCA CAA GAC CGA GTG GAC TTT GAG 566

T T E T V E P S M L Q R I L T G L P 168  
ACC ACG GAG ACC GTG GAG CCC AGC ATG CTG CAG CGC ATC CTC ACG GGT TTA CCA 620

D R Q S E V P A G Q S R G A A G V S 186  
GAC AGG CAG AGC GAG GTG CCG GCT GGC CAA AGC AGG GGG GCA GCC GGG GTC TCT 674

V V D I E A I K A F L K K C W S V D 204  
GTC GTG GAT ATC GAA GCT ATC AAA GCC TTC CTG AAG AAG TGC TGG AGT GTA GAT 728

I S T K E Y A Y L K G A V L F N P D 222  
ATC AGT ACG AAG GAG TAT GCG TAC CTG AAA GGA GCT GTG CTG TTC AAC CCA GAT 782

V E G L R C L H Y I Q S L R R E A H 240  
GTG GAG GGT TTG CGC TGC CTC CAC TAC ATC CAG TCT CTG CGT CGG GAA GCG CAC 836

Q A L N E H V R L I H R E D T T R F 258  
CAG GCT CTG AAC GAG CAC GTC AGG CTG ATC CAC CGC GAG GAC ACG ACG CGG TTC 890

A K L L I A L S M L R A I N P L V V 276  
GCC AAA CTG CTC ATA GCT CTG TCC ATG CTG AGG GCC ATC AAC CCG CTG GTG GTC 944

A Q L F F R P V I G A V N I E E V L 294  
GCA CAA CTC TTC TTC AGA CCC GTT ATA GGG GCC GTC AAC ATC GAG GAG GTG CTC 998

M E M F Y G K \* 312  
ATG GAG ATG TTT TAC GGG AAA TAG GTC ACA GTC CAC AGT GCA CTG AGG TGA ATT 1052

CAG CAG ATT CAG ATG CCA GAT GGA CTG AAA TGC TCC AAT CTC TTA TTG AGT ATG 1106  
AGA TGT GGG AAG ATG AAG AGG ATA ATA GGG ACT GAA TTT ACA ACT ACT GTG TGT 1160  
TGG AGA TCT TCA AGG ACT GTG ACA GTG ACC AAC ACA GCC TAA GTG TGT GCG TGT 1214  
GTG TAT GAG AGA ATG AGA AGA GAG AGT TTG AGG GCA AAC TAT GTT ATA ATA 1268  
GAG GAA AAA ACA AAG CAG CTG CTG GAA TTC ATA ACT TAT TTG TTT TTA TAT AAA 1322  
CTA TTT TTC TAT **AAT AAA** GAA ATA CTC TCA GAA AAA AAA AAA AAA AAA AAC 1373
